1                   **Optimization and validation of a quadruplex real-time PCR assay**  
2                                   **for the diagnosis of diphtheria**

3

4 Edgar Badell<sup>1,2</sup>, Sophie Guillot<sup>1</sup>, Marie Tulliez<sup>1</sup>, Marine Pascal<sup>1</sup>, Leonardo-Gabriel Panunzi<sup>1</sup>,  
5 Samuel Rose<sup>3</sup>, David Litt<sup>3</sup>, Norman K. Fry<sup>3,4</sup> and Sylvain Brisse<sup>1,2,#</sup>

6 <sup>1</sup>Institut Pasteur, Biodiversity and Epidemiology of Bacterial Pathogens, Paris, France.

7 <sup>2</sup>Institut Pasteur, National Reference Center for Corynebacteria of the *diphtheriae* complex,  
8 Paris, France.

9 <sup>3</sup>Respiratory and Vaccine Preventable Bacteria Reference Unit, National Infection Service,  
10 Public Health England, London, UK

11 <sup>4</sup>Immunisation and Countermeasures Division, National Infection Service, Public Health  
12 England, London, UK

13

14

15 **# Corresponding author:** Sylvain Brisse. Biodiversity and Epidemiology of Bacterial  
16 Pathogens, Institut Pasteur, 25 rue du Docteur Roux, F-75724 Paris, France.

17 E-mail: [sylvain.brisse@pasteur.fr](mailto:sylvain.brisse@pasteur.fr); Phone +33 1 45 68 83 34

18

19 **Running title:** Diagnostic of diphtheria by qPCR

20 **Abstract**

21

22 Diphtheria is caused by toxigenic strains of *Corynebacterium diphtheriae*, *Corynebacterium*  
23 *ulcerans* and *Corynebacterium pseudotuberculosis*. For diagnostic purposes, species  
24 identification and detection of toxigenic strains (diphtheria toxin (*tox*)-positive strains) is  
25 typically performed using end-point PCR. A faster quadruplex real-time PCR (qPCR) was  
26 recently developed (De Zoysa *et al.* J Med Microbiol. 2016 65(12):1521-1527). Here, we  
27 present an improvement of the quadruplex method, in which a 16S rRNA gene target was  
28 added as an internal processing control, providing confirmation of the presence of bacterial  
29 DNA in the assays. This improved qPCR method was validated using 36 bacterial isolates and  
30 16 clinical samples. The method allows detection of the *tox* gene and distinguishing  
31 *C. diphtheriae* (including the newly described species *C. belfantii*) from *C. ulcerans* and  
32 *C. pseudotuberculosis*. Complete diagnostic specificity, sensitivity and experimental  
33 robustness of the method to temperature and reagent concentration variations were  
34 demonstrated. The lower limit of detection for *C. diphtheriae*, *C. ulcerans* and *tox* targets was  
35 1.86 genome copies per 5  $\mu$ L reaction volume. Finally, the method was successfully used on  
36 two distinct qPCR technologies (LightCycler 480, Roche Diagnostics and Rotor-Gene Q,  
37 Qiagen) and in two laboratories (Institut Pasteur, Paris, France and Public Health England –  
38 National Infection Service, London, UK). This work describes validation of the improved  
39 qPCR quadruplex method and supports its implementation for the biological diagnosis of  
40 diphtheria.

## 41 **Introduction**

42 *Corynebacterium diphtheriae* is the main etiological agent of diphtheria, a once-common  
43 acute human infection classically affecting the upper respiratory tract and occasionally the  
44 skin. The severe manifestations of the disease are caused by the action of the diphtheria toxin,  
45 produced by some strains of *C. diphtheriae* which carry the *tox* gene. Strains of  
46 *Corynebacterium ulcerans* and more rarely *Corynebacterium pseudotuberculosis* can also be  
47 toxigenic *i.e.*, be capable of secreting the toxin, and can cause infections in humans. The three  
48 species are phylogenetically related and we collectively define them as the *C. diphtheriae*  
49 species complex. Recently a subset of *C. diphtheriae* strains of one of the four biovars,  
50 Belfanti, were recognized as forming a novel species, *C. belfantii* (1). Although this novel  
51 species also belongs to the *C. diphtheriae* complex, *C. belfantii* strains generally do not carry  
52 the *tox* gene (1, 2).

53 Diphtheria is a well-controlled disease in countries with high vaccination coverage. However,  
54 the vaccine targets the toxin but does not prevent transmission of bacteria of the  
55 *C. diphtheriae* complex, and low coverage or discontinuation of vaccination can result in a  
56 rapid resurgence of diphtheria (3, 4). Further, *C. ulcerans* infections in humans have emerged  
57 recently and usually involve close contacts with animals, mainly domestic cats and dogs (5,  
58 6). *C. pseudotuberculosis* is primarily a veterinary pathogen that infects ungulates such as  
59 sheep and goats (7), and the rare human infections with *C. pseudotuberculosis* are associated  
60 with occupational risk factors (8–10). Although rarely reported, *C. diphtheriae* can also infect  
61 animals such as cats, cows and horses (11–13). Identification of putative toxigenic  
62 corynebacteria at species level is classically performed by biochemical phenotypic methods  
63 (14–16) and more recently by matrix-assisted laser desorption/ionization time of flight  
64 (MALDI-TOF) mass spectrometry (17, 18). However, phenotypic methods require strain  
65 culture and isolation and are slow. In addition, the biochemical identification of  
66 *C. pseudotuberculosis* and its differentiation from other corynebacteria, especially *C.*  
67 *ulcerans*, can be difficult (10). Further, these methods cannot determine the toxigenic status of  
68 strains.

69 Determination of the potential toxigenic status of clinical isolates is the most critical aspect of  
70 diphtheria diagnosis, as it informs public health action and patient care, including possible  
71 treatment by administration of antitoxin. End-point PCR assays targeting the *tox* gene were

72 developed in the 1990s (19–21) and are widely used to screen for the presence of potentially  
73 toxigenic strains directly from clinical samples or from bacterial cultures. Detection of the *tox*  
74 gene can also be combined with species identification PCR targets in multiplex assays (9).  
75 Because non-toxinogenic toxin-bearing (NTTB) isolates were described, the detection of the  
76 *tox* gene only provides presumption of toxigenicity, which can be confirmed using the Elek  
77 test (15).

78 Real-time PCR (qPCR, for quantitative PCR) presents the advantages of faster data collection  
79 than classical PCR, low contamination risks and high sensitivity. Several qPCR assays that  
80 target the *tox* gene have been described (22–25). Recently, a quadruplex qPCR assay for  
81 detection of the *tox* gene and identification of *C. diphtheriae*, *C. ulcerans* and *C.*  
82 *pseudotuberculosis* by targeting their RNA polymerase  $\beta$ -subunit (*rpoB*) gene sequences, was  
83 developed by De Zoysa *et al.* (26). For PCR diagnostic purposes, it is considered best practice  
84 to include process control(s) capable of detection both extraction failure and inhibition of  
85 PCR amplification (27). Whilst the De Zoysa *et al.* (21) method uses amplification of the  
86 green fluorescent protein (*gfp*) gene on control DNA to test for PCR inhibition, it does not  
87 include a control for extraction failure (*i.e.*, one capable of detecting the presence/absence of  
88 bacterial DNA in the PCR assay).

89 Here, we aimed to address this limitation by replacing the *gfp* target gene by a universal  
90 fragment of the 16S rRNA (u-16S) gene sequence to serve as internal processing control.  
91 Further, we aimed to validate the improved qPCR assay directly on clinical specimens such as  
92 throat swabs and pseudomembrane biopsies. Additionally, we tested the characteristics of the  
93 modified quadruplex qPCR assay including specificity, sensitivity, reproducibility,  
94 experimental robustness and its implementation on distinct qPCR apparatuses and in separate  
95 laboratories.

## 96 **Materials and Methods**

97

98 **Reference strains of the *Corynebacterium diphtheriae* complex.** In experiments performed  
99 at the French National Reference Center, *C. diphtheriae* strain NCTC10648 (National  
100 Collection of Type Cultures, Public Health England, UK), which bears the *tox* gene (*tox*+),  
101 and *C. diphtheriae* strain NCTC10356, which is *tox*-negative (*tox*-), were used as positive and  
102 negative *tox* PCR controls, respectively, and as positive controls for *C. diphtheriae*  
103 identification. *Corynebacterium pseudotuberculosis* strain CIP102968<sup>T</sup> and *Corynebacterium*  
104 *ulcerans* strain NCTC12077, which are both *tox*-, were used as controls for *C.*  
105 *pseudotuberculosis* and *C. ulcerans* identification, respectively. In the validation experiments  
106 at Public Health England, strains NCTC10648 and NCTC12077 were used as controls, as  
107 previously described (26).

108

109 **Clinical isolates, strains and specimens.** Clinical isolates (n = 36), laboratory strains (n = 7)  
110 and specimens (n = 16) that had been previously characterized at the French National  
111 Reference Center for the Corynebacteria of the *diphtheriae* complex were included (**Table 1**).

112

### 113 **DNA extraction by the boiling method.**

114 DNA extraction was performed as follows. For bacterial strains, the method described by De  
115 Zoysa *et al.* (21) was used. For clinical swab material, swabs were introduced into a  
116 DNA/DNase/RNase free 1.5 ml Eppendorf Biopur tube (Cat. N° 0030 121.589, Eppendorf,  
117 Germany) containing 500 µl of nuclease free water (Cat. N°. P119C/Promega/U.S.A). The  
118 upper part of the swabs was cut using sterile scissors to allow closing of the tube. The tubes  
119 were vortexed thoroughly and placed in a preheated heating block at 100°C for 15 min. The  
120 swabs were then removed from tubes using sterile forceps, and the tubes centrifuged for 1 min  
121 at 13,000 g to pellet cell debris. For tissue samples, a piece of ca. 1 square cm of  
122 pseudomembrane was cut using sterile dissection forceps and scissors and introduced into a  
123 DNase/RNase free 1.5 ml Eppendorf tube as described above. The sample was ground using a  
124 sterile mini-grinder until a homogeneous suspension was obtained. The tubes were placed in a  
125 preheated heating block at 100°C for 15 min and then vortexed and centrifuged for 1 min at  
126 13,000 g to pellet cell debris. The collected supernatant was used as template DNA for the  
127 PCR. A similar tube containing only 500 µl of nuclease-free water was included as no  
128 template control (NTC) for each extraction. Following the final centrifugation step for each

129 sample type the supernatant was transferred to a new tube and used as template DNA for the  
130 PCR.

131

132 **DNA extraction using the DNeasy blood and tissue Kit (Qiagen).** To extract DNA from  
133 bacteria, a lysis step was added to the extraction protocol described by the manufacturer: a  
134 1 $\mu$ L loopful of bacterial colonies was emulsified in 180  $\mu$ L of lysis buffer containing 20 mM  
135 Tris-HCl, pH8, 2 mM EDTA, 1.2% Triton X-100, 20 mg/mL lysozyme, in a DNase/RNase  
136 free 1.5 ml Eppendorf tube and incubated in a heating block at 37°C for 1 hour, with mixing  
137 every 20 min. A DNase/RNase free 1.5 ml Eppendorf tube containing 180  $\mu$ L of a home-  
138 made lysis buffer but no bacterial colonies was included as a NTC. Then, the manufacturer  
139 protocol, modified slightly by us, was followed. In brief, 25  $\mu$ L of proteinase K and 200  $\mu$ L of  
140 AL buffer were added to the preparation, vortexed for 15 sec and incubated in a heating block  
141 at 56°C for 30 min. The preparation was then vortexed for *ca.* 30 sec and incubated in a  
142 heating block at 72°C for 10 min. At the end of the incubation, 200  $\mu$ L of ethanol at -20°C  
143 were added to the tube and vortexed for 15 sec, and the supernatant was transferred into a  
144 DNeasy columns and centrifuged for 1 min at 4500 g. Five hundred microliters of AW1  
145 buffer were added to the column, which was then centrifuged for 1 min at 4500 g . This step  
146 was repeated after adding AW2 buffer with a centrifugation of 3 min at 6700 g. After each  
147 centrifugation, the collecting tube was discarded and replaced by a new one, except for the  
148 last step in which the collecting tube was replaced by a DNA/DNase/RNase-free 1.5 mL  
149 Eppendorf tube. Then, 100  $\mu$ L of AE buffer, preheated to *ca.* 55°C, were carefully added to  
150 the column and then centrifuged for 1 min at 4500 g. The eluate was recovered, added to the  
151 top of the same column and centrifuged again for 1 min at 4500 g. Finally, the column was  
152 discarded and the eluate was kept at +5°C.

153 To extract DNA from swab samples, swab tips were placed into DNA/DNase/RNase-free 1.5  
154 ml Eppendorf tubes containing nuclease-free water (Promega). The swab shafts were cut with  
155 a pair of sterile dissection scissors to allow closing of the tubes. Tubes were vortexed for  
156 about 5 mins and swabs removed using sterile forceps. Then, the tubes were centrifuged for 5  
157 min at 8000 g. The supernatants were discarded and 150  $\mu$ L of home-made lysis buffer,  
158 described above, was added to each pellet. This suspension was incubated at 37°C in a  
159 heating block for 1 hour. Then, the same procedure as described above for bacteria was  
160 followed. At the end of the extraction, the tube was incubated for 10 min at 95°C in a heating  
161 block to inactivate pathogens which could be contained in the samples.

162 To extract DNA from tissue samples, we proceeded in the same way as indicated above for  
163 the boiling method from tissue samples until obtaining a homogeneous suspension, using the  
164 home-made lysis buffer instead of nuclease-free water. Then, this suspension was incubated at  
165 37°C in a heating block for about 1 hour, and the same procedure as described above for  
166 bacteria was performed. A NTC was included in the above procedures. This NTC consisted of  
167 a DNA/DNase/RNase-free 1.5 mL Eppendorf tube, which followed the same treatment as  
168 clinical specimens, but in which there was no clinical specimen material.

169

170 **Primers and probes.** The primers and probes used to detect the *tox* gene and *rpoB* genes for  
171 *C. diphtheriae* and *C. ulcerans/C. pseudotuberculosis* species identification were as described  
172 by De Zoysa *et al.* (21). For this study we introduced a conserved fragment of the 16S rRNA  
173 gene instead of the fragment of *gfp* gene (28) as the internal process control (IPC). The two  
174 primers and probe (u-16S) used to detect the 16S rRNA gene were designed with the software  
175 LC probe design2 (Roche). 16S rRNA sequences of known pathogenic or commensal species  
176 of the respiratory tract were aligned and a final selection of primers and probe was  
177 accomplished according to their universality (**Figure S1**). The sequences of primers and  
178 probes are given in **Table 2**.

179

180 **Reference end-point PCR method for *tox* gene detection.** To detect the diphtheria *tox* gene,  
181 we used the conventional end-point PCR method described by Hauser *et al.* (20) modified by  
182 us to detect in parallel the bacterial 16S rRNA. In brief, DNA was extracted using the DNeasy  
183 Blood and tissue Kit (Qiagen) as described above. Two µL of DNA suspension were used in  
184 the final reaction described below. The PCR reaction was performed in a 50 µL volume  
185 containing: 0.25 µL of *Taq* DNA polymerase (5U/µL; Cat. No. 18038-026, Invitrogen, USA),  
186 5 µL of 10X buffer (included in the *Taq* DNA polymerase kit), 2 µL of MgCl<sub>2</sub> (50mM,  
187 included in the *Taq* DNA polymerase kit), 5 µL of 10 µM DT1 and DT2 primers (20), 1.25  
188 µL of U5 and U4a primers (**Table S1**), 10 µL of deoxynucleoside triphosphates (2 mM, Cat.  
189 No. R1121, ThermoScientific, Lithuania). Thermocycling was performed on a AB 2720  
190 thermocycler (Applied BioSystems, Singapore) with 1 cycle at 94°C for 3 min, followed by  
191 35 cycles at 94°C for 20 s, 68 °C for 30 s, and 72 °C for 30 s and a final temperature of 15°C.  
192 The amplified products were resolved by electrophoresis on 3% (w/v) agarose gels and  
193 visualized by ethidium bromide staining.

194

195 **Elek test for toxin production.** Clinical isolates were tested for toxin production using  
196 Elek's test modified by Engler *et al.* (15).

197

198 **Multiplex end-point PCR for species identification.** A conventional multiplex end-point  
199 PCR was used to identify the isolates. This is a home-made end-point PCR adapted from  
200 these described by Pacheco *et al.* 2007(29) and Pimenta *et al.* 2008 (30). Briefly, DNA was  
201 extracted using the DNeasy Blood and tissue Kit, Qiagen as described above. Two  $\mu\text{L}$  of  
202 DNA suspension were used in the final reaction described below. The PCR reaction was  
203 performed in a 50  $\mu\text{L}$  volume containing: 0.25  $\mu\text{L}$  of *Taq* DNA polymerase (5U/ $\mu\text{L}$ , Cat. No.  
204 18038-026, Invitrogen, USA), 5  $\mu\text{L}$  of 10X Buffer (included in the *Taq* DNA polymerase kit),  
205 2  $\mu\text{L}$  of  $\text{MgCl}_2$  (50mM, included in the *Taq* DNA polymerase kit), 1  $\mu\text{L}$  of each primers  
206 (10  $\mu\text{M}$ ) (29, 30), 5  $\mu\text{L}$  of deoxynucleoside triphosphates (2 mM), (ThermoScientific, Cat.  
207 No. R1121, Lithuania). Thermocycling was performed on a thermocycler MJ Mini (BIO-  
208 RAD, Mexico) using 1 cycle at 95°C for 5 min, and 40 cycles at 95°C for 1 min, 58°C for  
209 40 s, and 72°C for 1 min 30 s. Finally, the temperature was set to 72°C for 7 min and then at  
210 15°C. The amplified products were resolved by electrophoresis on 3% (w/v) agarose gels  
211 and visualized by ethidium bromide staining.

212

213 **qPCR.** PCR assays were performed at the French National Reference Center, except where it  
214 is explicitly stated that they were performed at Public Health England. For qPCR  
215 amplification, we used the Qiagen Rotor-Gene Q (RGQ) thermocycler method as described  
216 by De Zoysa *et al.* (21). Some experiments were performed in parallel on a Roche  
217 LightCycler 480 II (LC480) thermocycler. Reaction mixture volumes were 20  $\mu\text{L}$  in both  
218 thermocyclers. Each reaction mix comprised 10  $\mu\text{L}$  of 2x Rotor-Gene Multiplex PCR Master  
219 Mix (Rotor-Gene Multiplex PCR Kit, catalogue no. 204774; Qiagen), 1  $\mu\text{L}$  of a mix of  
220 primers and probes (to give final concentrations of 0.5 mM each primer and 0.2 mM each  
221 probe), 4  $\mu\text{L}$  of  $\text{H}_2\text{O}$  PCR grade and 5  $\mu\text{L}$  of DNA template or  $\text{H}_2\text{O}$  PCR grade. Five brands  
222 of  $\text{H}_2\text{O}$  PCR grade were tested: Nuclease-free water (Cat. No. P119C, Promega, USA);  
223 UltraPure™ DNase/RNase-Free distilled water (Cat. No. 10977-035, Invitrogen™, UK);  
224 RNase-free water (included in the Rotor-Gene Multiplex PCR Kit, catalogue no. 204774,  
225 Qiagen, Germany), nuclease-free water (Cat. No. AM9937, Ambion, USA); and  $\text{H}_2\text{O}$  PCR  
226 grade (included in the Kit LightCycler® 480 Probes Master, Cat. No. 04707494001, Roche,  
227 Germany).



228 The cycling conditions were identical for both thermocyclers: an initial activation at 95°C for  
229 5 min, followed by 45 cycles of denaturation at 95°C for 10 s followed by the  
230 hybridization/extension step at 60°C for 20 s. Acquisition of the fluorescence signal was set at  
231 60°C during each cycle. The data analysis software used were Q-Rex (Qiagen) and  
232 LightCycler480 SW 1.5. For the determination of the cycle thresholds (Ct) value on the RGQ,  
233 the analysis options used were “Basic”, for all analyses, and “Slope correction” and/or “Take  
234 off Adjustment” if curves needed to be corrected. On the LC480 the second derivative method  
235 developed by Roche was used. Non-specific fluorescence from the HEX channel  
236 (*C. diphtheriae* target) can appear in the ROX channel (*tox* target) because the wavelengths of  
237 the two dyes are very close to each other (**Table S2**). To avoid this problem, the crosstalk  
238 compensation settings on the analysis options of the RGQ were used to define the channels  
239 that had to be compensated. Similarly, for the LC480, a colour compensation was performed  
240 to adjust the fluorescence results of each channel (**Table S3**). In the validation experiments at  
241 Public Health England, the PCRs were performed on an RGQ machine. When compared to  
242 the equivalent PCR using *gfp* as the IPC, the *gfp* reagents previously described (26) were  
243 used.

244

245 **Analytical sensitivity assays.** The lower limits of detection (LLOD) of the qPCR assay were  
246 determined for each target at the French National Reference Center by using series of 10-fold  
247 dilutions of *C. diphtheriae* NCTC103356, *C. diphtheriae* NCTC10648, *C. ulcerans*  
248 NCTC12077 and *C. pseudotuberculosis* CIP102968<sup>T</sup> DNAs at the initial concentration of 10  
249 pg/μL. The online calculator page of Andrew Staroscik (<https://cels.uri.edu/gsc/cndna.html>)  
250 was used to calculate the number of genome copies corresponding to the DNA quantity. In the  
251 validation experiments at Public Health England, sensitivity of the qPCR assay was compared  
252 when using the u-16S IPC and the *gfp* IPC (26) using 2-fold serial dilutions of *C. diphtheriae*  
253 NCTC10648 and *C. ulcerans* NCTC12077 DNA between 40 and 5 genome copies/μL.

254

255 **Experimental robustness assays.** To test the robustness of the method to temperature  
256 variation, we increased and decreased the temperatures of denaturation and  
257 annealing/elongation steps in the PCR program by 1°C, 2°C or 3°C. To test the effect of  
258 pipetting volume variation, we increased or decreased by 20% the volume of all PCR mix  
259 reagents simultaneously, while keeping fixed the volume of DNA template at 5 μL.

## 260 **Results**

261

262 **Validation of u-16S primers and probe.** A pair of primers and a probe that were maximally  
263 conserved on an alignment of 16S rRNA sequences (**Figure S1**) were defined (**Table 2**) and  
264 named the u-16S target. To test the newly-designed u-16S primers and probe for use as an  
265 appropriate control for bacterial DNA presence, we compared fluorescence signals obtained  
266 on the LC640 channel (used as dye for the u-16S target) using either DNA from bacteria or no  
267 template controls (NTCs). DNA at 10 pg/ $\mu$ L from four reference strains of the *diphtheriae*  
268 complex (NCTC10356, NCTC10648, NCTC12077 and CIP102968<sup>T</sup>) (**Table 1**) was tested on  
269 both the RGQ and LC480 thermocyclers, initially in simplex PCR. Crossing thresholds (Ct)  
270 were recorded in experiments in both instruments (although called crossing point, CP in the  
271 Roche system, we will call them Ct here for consistency). Fluorescence signals observed with  
272 bacterial DNA always had Ct values <27, whereas fluorescence signals from NTCs always  
273 showed Ct values  $\geq$ 27 or higher (**Figure 1A**). This amplification signal was not expected for  
274 NTCs, and we suspected a contamination of the PCR grade H<sub>2</sub>O used, but it was observed  
275 systematically, even when using different brands and batches of PCR grade H<sub>2</sub>O. We  
276 conclude that the signal is presumably due to the presence of some residual genomic bacterial  
277 DNA in the qPCR mix reagents (31). The qPCR assay result on the LC640 channel was thus  
278 considered negative for the NTCs if the Ct value was  $\geq$  27, and was considered positive if the  
279 Ct value was  $\leq$ 26.

280 We then tested whether the newly designed u-16S target signal interfered with the  
281 amplification signals expected in the channels HEX (*C. diphtheriae*), FAM (*C. ulcerans/C.*  
282 *pseudotuberculosis*) and ROX (*tox*) when used in quadruplex (4plex). We observed that  
283 fluorescence signals detected in the three channels were as expected for each target (**Figure 1,**  
284 **panels B-D**). Furthermore, no fluorescence signals in FAM, HEX and ROX channels were  
285 detected for the NTCs. Expected amplification of all targets was observed both on the RGQ  
286 and the LC480 platforms.

287

288 **Analytical sensitivity.** The LLOD for *C. diphtheriae rpoB*, *C. ulcerans rpoB* and *tox* targets  
289 was 1 fg per  $\mu$ L, which corresponds to 0.37 genome copies per  $\mu$ L, or 1.86 genome copies per  
290 5 $\mu$ L reaction. For *C. pseudotuberculosis*, the *rpoB* limit of detection was 186 genome copies  
291 per reaction. The LLOD obtained with *C. pseudotuberculosis* showed a lower sensitivity with  
292 the *C. ulcerans/C. pseudotuberculosis rpoB* target. Identical LLOD values were obtained on  
293 both thermocyclers. Regarding the u-16S target, between the dilutions 10 fg/ $\mu$ L and 0.1 fg/ $\mu$ L

294 the Ct values were *ca.* 29 on the RGQ and *ca.* 33 on the LC480. As qPCR reagents contain  
295 DNA traces, it was not possible to observe the extinction of the fluorescence signal and  
296 therefore no LLOD could be determined for the u-16S target.

297

298 **Comparison of the two thermocyclers.** We observed amplification curves in both  
299 thermocyclers for all targets tested. As mentioned above, LLOD were the same for all targets  
300 on both platforms. We noted that Ct values obtained with the two thermocyclers were slightly  
301 different (**Table 3**), but this did not impact the qualitative interpretation of the qPCR assay in  
302 terms of positive or negative results. We conclude that performance of the quadruplex qPCR  
303 assay on the two platforms was equivalent. For practical reasons, the subsequent experiments  
304 were performed only on the RGQ.

305

306 **Analyses of strains, clinical isolates, and specimens.** A panel of 43 bacterial DNA extracts  
307 from clinical isolates and strains belonging or not to the *C. diphtheriae* complex, and 16  
308 clinical specimens, were analysed. This sample included 11 tox-positive isolates, among  
309 which six were non-toxicogenic toxin bearing (NTTB) isolates. Fluorescence signals specific for  
310 *C. diphtheriae*, *C. ulcerans/C. pseudotuberculosis* and *tox* were always observed according to  
311 expectations, as defined using the conventional end-point PCR (**Table 1**). NTTB isolates were  
312 also positive for *tox* gene detection by the 4plex qPCR. These results confirm that the *tox* and  
313 species identification targets previously developed are correctly detected even in the presence  
314 of the novel u-16S target within the 4plex assay. In addition, fluorescence signals were  
315 detected for the u-16S target for all bacterial DNA extracts tested (all with Ct values  $\leq 26$ ),  
316 whether or not they were in the *C. diphtheriae* complex. This confirmed that the negative  
317 fluorescence signals in the channels HEX, FAM and ROX with non-*C. diphtheriae* complex  
318 isolates were not due to the accidental absence of bacterial DNA.

319

320 **Comparison of two DNA extraction methods.** As amplifiable DNA is much faster to  
321 prepare using the boiling method (approximately 20 minutes) than using the kit extraction  
322 method (approximately 2 hours), we evaluated the boiling method as a template DNA  
323 preparation method for the 4plex qPCR. The 54 samples (isolates and clinical specimens)  
324 processed using this method were all positive for the u-16S channel (**Table 1**), showing that  
325 amplifiable DNA was obtained in all cases. Furthermore, samples processed using the boiling  
326 method were positive for all targets according to expectations based on the kit extraction  
327 method. We conclude that even though the DNA concentration is lower than with the kit

328 extraction method, the boiling method can replace the kit extraction method for DNA  
329 preparation for the 4plex qPCR.

330

331 **Robustness.** When increasing or decreasing the temperature of the thermocycler cycles by  
332 3°C, Ct values did not vary by more than 2 cycles and no difference was observed in the  
333 interpretation of the qPCR amplification results (**Fig. S2**). The variation of the reagent  
334 volumes by +20% or -20% also had limited impact on the slopes and Ct values (< 2)  
335 compared to normal conditions (data not shown). These tests show that the 4-plex PCR is  
336 robust in the face of changes in experimental conditions.

337

338 **External validation of the qPCR.** The modified qPCR using the u-16S IPC (instead of the  
339 *gfp* IPC) was validated in a second laboratory, the Respiratory and Vaccine Preventable  
340 Bacteria Reference Unit at Public Health England (RVPBRU-PHE), to confirm its portability  
341 and test its performance in comparison to the original method. Purified DNA from the  
342 toxigenic *C. diphtheriae* strain NCTC10648 and the non-toxigenic *C. ulcerans* strain  
343 NCTC12077 were tested in both versions of the qPCR at concentrations of 40, 20, 10 and 5  
344 genome copies/μL in parallel over 20 runs to assess any effect on analytical sensitivity. The  
345 results showed that the sensitivity of the PCRs against the *C. diphtheriae* *rpoB*,  
346 *C. ulcerans/C. pseudotuberculosis* *rpoB* and the *tox* genes were essentially unaffected by  
347 changing the IPC; the differences in mean Ct values generated by both versions of the assay  
348 for comparative samples were less than 1 cycle (**Supplementary Table S4**). Positive results  
349 with the u-16S reagents did not generate any false positives for the other three targets. Ct  
350 values in the u-16S channel were all  $\geq 28$  cycles for NTCs (**Supplementary Table S4**; actual  
351 range 28.80 – 30.11). As expected, Ct values for the *gfp* IPC were consistently between 30  
352 and 32 cycles regardless of the presence of target DNA.

353 **DISCUSSION**

354

355 The quadruplex real-time PCR assay developed by De Zoysa *et al.* (26) for the identification  
356 of potentially toxigenic corynebacteria was an important advance in our diagnostic  
357 armamentarium. This includes an IPC consisting of a *gfp* gene target present in control DNA  
358 that is added to every PCR reaction in order to detect PCR inhibition. However, this IPC  
359 cannot distinguish between the analysis of a species that is not *C. diphtheriae*, *C. ulcerans* or  
360 *C. pseudotuberculosis* and a false negative due to the accidental lack of bacterial target DNA.  
361 However, in the theoretical case where the DNA extracted from a clinical sample was  
362 erroneously not added into the PCR mix, a positive signal will still be detected in the *gfp*  
363 channel. Negative results for *rpoB* and *tox* targets may lead to the wrong interpretation that no  
364 genetic material of *C. diphtheriae* complex was present.

365

366 Here we introduced a target corresponding to a universal fragment of the bacterial 16S rRNA  
367 gene instead of the *gfp* gene. This provides the ability to confirm the presence of bacterial  
368 DNA in the sample tubes in addition to the absence of PCR inhibition. Because it covers a  
369 broad range of bacteria, the fragment of u-16S is expected to be amplified if any bacterial  
370 DNA was introduced in the sample. The interpretation of the absence of signal for the u-16S  
371 target is that no bacterial DNA was present, or that the PCR amplification was inhibited, thus  
372 invalidating the assay.

373

374 We did detect some false positive signals on the LC640 (u-16S) channel when the NTCs were  
375 analysed. The cause of this is probably due to some residual genomic bacterial DNA present  
376 in the qPCR mix reagents. Contamination of the *Taq* DNA polymerase may originate from its  
377 production from bacterial cultures (31). As the Ct of these signals were always  $\geq 27$ , whereas  
378 the Ct values from isolates or clinical samples were always  $<27$  (typically between 17 and  
379 20), we propose to treat 27 cycles as the background level in the u-16S channel and that any  
380 runs in which Ct values for the NTCs are  $\geq 27$  are valid.

381

382 We found a complete concordance of the improved 4-plex method regarding analyses of  
383 bacterial isolates as compared with the reference method, consistent with the results reported  
384 previously (26). In addition, we demonstrated that the qPCR can be used to detect the targets  
385 directly from clinical samples including pharyngeal swabs or pseudomembrane tissues. This  
386 is important because faster results can be obtained by avoiding the microbial culture step,

387 which typically takes 18-24 hours. We also demonstrated that the improved 4-plex qPCR can  
388 be performed using DNA extracted using the boiling method from clinical samples or isolates,  
389 and that the method is robust within an important range of experimental variation of reagents  
390 volumes and thermocycler temperature drift that is unexpected to be exceeded in most  
391 laboratories. Moreover, the portability and performance of the modified 4plex qPCR were  
392 validated on an RGQ apparatus at RVPBR-PHE. Remarkably, the differences in mean Ct  
393 values between the two methods were less than 1 cycle in that laboratory. Finally, the LLOD  
394 defined using both thermocyclers were identical, providing flexibility to users in the choice of  
395 the thermocycler.

396

397 The use of a single target for *C. diphtheriae* and *C. belfantii* on the one hand, and of  
398 *C. ulcerans* and *C. pseudotuberculosis* on the other hand, does not allow for species  
399 discrimination within these pairs. *C. belfantii* can be identified by biotyping or by sequencing  
400 approaches (1). In humans, *C. pseudotuberculosis* is extremely rare and associated with  
401 contacts with goats or other production animals, whereas *C. ulcerans* is much more common.  
402 Therefore, positivity of *C. ulcerans/C. pseudotuberculosis* target assay may be interpreted in  
403 most cases as *C. ulcerans*. These two species are reliably distinguished using MALDI-TOF  
404 (17).

405 In conclusion, the improved 4-plex PCR method has the biological and technical  
406 characteristics required for the diagnostic of toxin gene-bearing strains of the *C. diphtheriae*  
407 species complex and we therefore recommend its deployment in medical biology and  
408 reference laboratories.

409

410 **Potential conflicts of interest**

411 All authors report no conflicts of interest

412

413 **Funding**

414 This work was supported by Institut Pasteur, Public Health France and Public Health

415 England.

416

417 **Previous meeting presentations**

418 The information in this work was not previously presented in any meeting.

419

420 **Acknowledgements**

421 We acknowledge the help of Melody Dzas and Annick Carmi-Leroy for the microbiological

422 characterization of the isolates.

423

424 **References**

425 1. Dzas M, Badell E, Carmi-Leroy A, Criscuolo A, Brisse S. 2018. Taxonomic status of

426 *Corynebacterium diphtheriae* biovar Belfanti and proposal of *Corynebacterium belfantii*

427 sp. nov. *Int J Syst Evol Microbiol* 68:3826–3831.

428 2. Bolt F, Cassiday P, Tondella ML, Dezoysa A, Efstratiou A, Sing A, Zasada A, Bernard K,

429 Guiso N, Badell E, Rosso ML, Baldwin A, Dowson C. 2010. Multilocus sequence

430 typing identifies evidence for recombination and two distinct lineages of

431 *Corynebacterium diphtheriae*. *J Clin Microbiol* 48:4177–85.

- 432 3. Lodeiro-Colatosti A, Reischl U, Holzmann T, Hernández-Pereira CE, Rísquez A, Paniz-  
433 Mondolfi AE. 2018. Diphtheria Outbreak in Amerindian Communities, Wonken,  
434 Venezuela, 2016-2017. *Emerging Infect Dis* 24:1340–1344.
- 435 4. Dureab F, Müller O, Jahn A. 2018. Resurgence of diphtheria in Yemen due to population  
436 movement. *J Travel Med* 25.
- 437 5. Wagner KS, White JM, Lucenko I, Mercer D, Crowcroft NS, Neal S, Efstratiou A,  
438 Diphtheria Surveillance Network. 2012. Diphtheria in the postepidemic period, Europe,  
439 2000-2009. *Emerging Infect Dis* 18:217–225.
- 440 6. Hacker E, Antunes CA, Mattos-Guaraldi AL, Burkovski A, Tauch A. 2016.  
441 *Corynebacterium ulcerans*, an emerging human pathogen. *Future Microbiol* 11:1191–  
442 208.
- 443 7. Abebe D, Sisay Tessema T. 2015. Determination of *Corynebacterium pseudotuberculosis*  
444 prevalence and antimicrobial susceptibility pattern of isolates from lymph nodes of  
445 sheep and goats at an organic export abattoir, Modjo, Ethiopia. *Lett Appl Microbiol*  
446 61:469–476.
- 447 8. Join-Lambert OF, Ouache M, Canioni D, Beretti J-L, Blanche S, Berche P, Kayal S.  
448 2006. *Corynebacterium pseudotuberculosis* necrotizing lymphadenitis in a twelve-year-  
449 old patient. *Pediatr Infect Dis J* 25:848–851.
- 450 9. Torres L de FC, Ribeiro D, Hirata R, Pacheco LGC, Souza MC, dos Santos LS, dos  
451 Santos CS, Salah M, Costa MM da, Ribeiro MG, Selim SA, Azevedo VA de C, Mattos-  
452 Guaraldi AL. 2013. Multiplex polymerase chain reaction to identify and determine the  
453 toxigenicity of *Corynebacterium* spp with zoonotic potential and an overview of human  
454 and animal infections. *Mem Inst Oswaldo Cruz* 108.



- 455 10. Heggelund L, Gaustad P, Håvelsrud OE, Blom J, Borgen L, Sundset A, Sørum H, Frøland  
456 SS. 2015. *Corynebacterium pseudotuberculosis* Pneumonia in a Veterinary Student  
457 Infected During Laboratory Work. *Open Forum Infect Dis* 2:ofv053.
- 458 11. Corboz L, Thoma R, Braun U, Zbinden R. 1996. [Isolation of *Corynebacterium*  
459 *diphtheriae* subsp. *belfanti* from a cow with chronic active dermatitis]. *Schweiz Arch*  
460 *Tierheilkd* 138:596–599.
- 461 12. Hall AJ, Cassiday PK, Bernard KA, Bolt F, Steigerwalt AG, Bixler D, Pawloski LC,  
462 Whitney AM, Iwaki M, Baldwin A, Dowson CG, Komiya T, Takahashi M, Hinrikson  
463 HP, Tondella ML. 2010. Novel *Corynebacterium diphtheriae* in domestic cats. *Emerging*  
464 *Infect Dis* 16:688–691.
- 465 13. Leggett BA, De Zoysa A, Abbott YE, Leonard N, Markey B, Efstratiou A. 2010.  
466 Toxigenic *Corynebacterium diphtheriae* isolated from a wound in a horse. *Vet Rec*  
467 166:656–657.
- 468 14. Efstratiou A, George RC. 1999. Laboratory guidelines for the diagnosis of infections  
469 caused by *Corynebacterium diphtheriae* and *C. ulcerans*. World Health Organization.  
470 *Commun Dis Public Health* 2:250–257.
- 471 15. Engler KH, Glushkevich T, Mazurova IK, George RC, Efstratiou A. 1997. A modified  
472 Elek test for detection of toxigenic corynebacteria in the diagnostic laboratory. *J Clin*  
473 *Microbiol* 35:495–498.
- 474 16. Neal SE, Efstratiou A, DIPNET, International Diphtheria Reference Laboratories. 2009.  
475 International external quality assurance for laboratory diagnosis of diphtheria. *J Clin*  
476 *Microbiol* 47:4037–4042.

- 477 17. Konrad R, Berger A, Huber I, Boschert V, Hörmansdorfer S, Busch U, Hogardt M,  
478 Schubert S, Sing A. 2010. Matrix-assisted laser desorption/ionisation time-of-flight  
479 (MALDI-TOF) mass spectrometry as a tool for rapid diagnosis of potentially toxigenic  
480 *Corynebacterium* species in the laboratory management of diphtheria-associated  
481 bacteria. *Euro Surveill* 15.
- 482 18. Farfour E, Leto J, Barritault M, Barberis C, Meyer J, Dauphin B, Le Guern A-S, Leflèche  
483 A, Badell E, Guiso N, Leclercq A, Le Monnier A, Lecuit M, Rodriguez-Nava V,  
484 Bergeron E, Raymond J, Vimont S, Bille E, Carbonnelle E, Guet-Revillet H, Lécuyer H,  
485 Beretti J-L, Vay C, Berche P, Ferroni A, Nassif X, Join-Lambert O. 2012. Evaluation of  
486 the Andromas matrix-assisted laser desorption ionization-time of flight mass  
487 spectrometry system for identification of aerobically growing Gram-positive bacilli. *J*  
488 *Clin Microbiol* 50:2702–2707.
- 489 19. Pallen MJ. 1991. Rapid screening for toxigenic *Corynebacterium diphtheriae* by the  
490 polymerase chain reaction. *J Clin Pathol* 44:1025–1026.
- 491 20. Hauser D, Popoff MR, Kiredjian M, Boquet P, Bimet F. 1993. Polymerase chain reaction  
492 assay for diagnosis of potentially toxinogenic *Corynebacterium diphtheriae* strains:  
493 correlation with ADP-ribosylation activity assay. *J Clin Microbiol* 31:2720–2723.
- 494 21. Pallen MJ, Hay AJ, Puckey LH, Efstratiou A. 1994. Polymerase chain reaction for  
495 screening clinical isolates of corynebacteria for the production of diphtheria toxin. *J Clin*  
496 *Pathol* 47:353–356.
- 497 22. Mothershed EA, Cassiday PK, Pierson K, Mayer LW, Popovic T. 2002. Development of  
498 a real-time fluorescence PCR assay for rapid detection of the diphtheria toxin gene. *J*  
499 *Clin Microbiol* 40:4713–4719.

- 500 23. Schuhegger R, Linder Mayer M, Kugler R, Heesemann J, Busch U, Sing A. 2008.  
501 Detection of toxigenic *Corynebacterium diphtheriae* and *Corynebacterium ulcerans*  
502 strains by a novel real-time PCR. *J Clin Microbiol* 46:2822–2823.
- 503 24. Sing A, Berger A, Schneider-Brachert W, Holzmann T, Reischl U. 2011. Rapid detection  
504 and molecular differentiation of toxigenic *Corynebacterium diphtheriae* and  
505 *Corynebacterium ulcerans* strains by LightCycler PCR. *J Clin Microbiol* 49:2485–2489.
- 506 25. Mancini F, Monaco M, Pataracchia M, von Hunolstein C, Pantosti A, Ciervo A. 2012.  
507 Identification and molecular discrimination of toxigenic and nontoxigenic diphtheria  
508 *Corynebacterium* strains by combined real-time polymerase chain reaction assays. *Diagn*  
509 *Microbiol Infect Dis* 73:111–120.
- 510 26. De Zoysa A, Efstratiou A, Mann G, Harrison TG, Fry NK. 2016. Development, validation  
511 and implementation of a quadruplex real-time PCR assay for identification of potentially  
512 toxigenic corynebacteria. *J Med Microbiol* 65:1521–1527.
- 513 27. Saunders N, Zambon M, Sharp I, Siddiqui R, Bermingham A, Ellis J, Vipond B, Sails A,  
514 Moran-Gilad J, Marsh P, Guiver M, HPA Microbiology Services Division null. 2013.  
515 Guidance on the development and validation of diagnostic tests that depend on nucleic  
516 acid amplification and detection. *J Clin Virol* 56:260–270.
- 517 28. Murphy M, Corcoran D, Buckley JF, O’Mahony M, Whyte P, Fanning S. 2007.  
518 Development and application of Multiple-Locus Variable number of tandem repeat  
519 Analysis (MLVA) to subtype a collection of *Listeria monocytogenes*. *International*  
520 *journal of food microbiology* 115:187–94.
- 521 29. Pacheco LGC, Pena RR, Castro TLP, Dorella FA, Bahia RC, Carminati R, Frota MNL,  
522 Oliveira SC, Meyer R, Alves FSF, Miyoshi A, Azevedo V. 2007. Multiplex PCR assay

- 523 for identification of *Corynebacterium pseudotuberculosis* from pure cultures and for  
524 rapid detection of this pathogen in clinical samples. *J Med Microbiol* 56:480–486.
- 525 30. Pimenta FP, Matias GAM, Pereira GA, Camello TCF, Alves GB, Rosa ACP, Hirata R,  
526 Mattos-Guaraldi AL. 2008. A PCR for *dtxR* gene: application to diagnosis of non-  
527 toxigenic and toxigenic *Corynebacterium diphtheriae*. *Mol Cell Probes* 22:189–192.
- 528 31. Philipp S, Huemer HP, Irschick EU, Gassner C. 2010. Obstacles of Multiplex Real-Time  
529 PCR for Bacterial 16S rDNA: Primer Specificity and DNA Decontamination of Taq  
530 Polymerase. *Transfus Med Hemother* 37:21–28.
- 531

532 **Figure legends**

533

534 **Figure 1.** Example of qPCR curves for each of the targets.

535

536

**Table 1. Strains, isolates and clinical samples analyzed.**

| Reference strains | Species and tox status*           | Universal 16S rRNA | <i>rpoB</i> C. diphtheriae | <i>rpoB</i> C. ulcerans/ C. pseudotuberculosis | tox gene | Toxin production (Elek test) | Conclusion                        |
|-------------------|-----------------------------------|--------------------|----------------------------|------------------------------------------------|----------|------------------------------|-----------------------------------|
| NCTC10356         | <i>C. diphtheriae</i> tox-        | +                  | +                          | -                                              | -        | ND                           | <i>C. diphtheriae</i> tox-        |
| NCTC10648         | <i>C. diphtheriae</i> tox+        | +                  | +                          | -                                              | +        | +                            | <i>C. diphtheriae</i> tox+        |
| FRC0043T          | <i>C. belfantii</i> tox-          | +                  | +                          | -                                              | -        | ND                           | <i>C. diphtheriae</i> tox-        |
| NCTC12077         | <i>C. ulcerans</i> tox-           | +                  | -                          | +                                              | -        | ND                           | <i>C. ulcerans</i> tox-           |
| CIP102968         | <i>C. pseudotuberculosis</i> tox- | +                  | -                          | +                                              | -        | ND                           | <i>C. pseudotuberculosis</i> tox- |
| CIP A95           | <i>C. pseudotuberculosis</i> tox- | +                  | -                          | +                                              | -        | ND                           | <i>C. pseudotuberculosis</i> tox- |
| CIP 52.103        | <i>C. pseudotuberculosis</i> tox- | +                  | -                          | +                                              | -        | ND                           | <i>C. pseudotuberculosis</i> tox- |
| CIP 52.104        | <i>C. pseudotuberculosis</i> tox- | +                  | -                          | +                                              | -        | ND                           | <i>C. pseudotuberculosis</i> tox- |
| CIP 52.97         | <i>C. pseudotuberculosis</i> tox- | +                  | -                          | +                                              | -        | ND                           | <i>C. pseudotuberculosis</i> tox- |
| CIP 59.46         | <i>C. pseudotuberculosis</i> tox- | +                  | -                          | +                                              | -        | ND                           | <i>C. pseudotuberculosis</i> tox- |
| NCTC764           | <i>Corynebacterium striatum</i>   | +                  | -                          | -                                              | -        | ND                           | Non <i>diphtheriae</i> complex    |
| <b>Isolates</b>   |                                   |                    |                            |                                                |          |                              |                                   |
| 00-0744           | <i>C. belfantii</i> tox-          | +                  | +                          | -                                              | -        | ND                           | <i>C. diphtheriae</i> tox-        |
| 05-3187           | <i>C. belfantii</i> tox-          | +                  | +                          | -                                              | -        | ND                           | <i>C. diphtheriae</i> tox-        |
| 06-4305           | <i>C. belfantii</i> tox-          | +                  | +                          | -                                              | -        | ND                           | <i>C. diphtheriae</i> tox-        |
| FRC0074           | <i>C. belfantii</i> tox-          | +                  | +                          | -                                              | -        | ND                           | <i>C. diphtheriae</i> tox-        |
| FRC0223           | <i>C. belfantii</i> tox-          | +                  | +                          | -                                              | -        | ND                           | <i>C. diphtheriae</i> tox-        |
| FRC0250           | <i>C. belfantii</i> tox-          | +                  | +                          | -                                              | -        | ND                           | <i>C. diphtheriae</i> tox-        |
| FRC0301           | <i>C. belfantii</i> tox-          | +                  | +                          | -                                              | -        | ND                           | <i>C. diphtheriae</i> tox-        |
| FRC0566           | <i>C. diphtheriae</i> tox+        | +                  | +                          | -                                              | +        | +                            | <i>C. diphtheriae</i> tox+        |
| FRC0568           | <i>C. diphtheriae</i> tox-        | +                  | +                          | -                                              | -        | ND                           | <i>C. diphtheriae</i> tox-        |
| FRC0570           | <i>C. diphtheriae</i> tox-        | +                  | +                          | -                                              | -        | ND                           | <i>C. diphtheriae</i> tox-        |
| FRC0018           | <i>C. diphtheriae</i> tox+        | +                  | +                          | -                                              | +        | +                            | <i>C. diphtheriae</i> tox+        |
| FRC0076           | <i>C. diphtheriae</i> tox+        | +                  | +                          | -                                              | +        | -                            | <i>C. diphtheriae</i> tox+        |

|                |                                    |   |   |   |   |    |                                   |
|----------------|------------------------------------|---|---|---|---|----|-----------------------------------|
| FRC0101        | <i>C. diphtheriae tox+</i>         | + | + | - | + | -  | <i>C. diphtheriae tox+</i>        |
| FRC0114        | <i>C. diphtheriae tox+</i>         | + | + | - | + | -  | <i>C. diphtheriae tox+</i>        |
| FRC0365        | <i>C. diphtheriae tox+</i>         | + | + | - | + | -  | <i>C. diphtheriae tox+</i>        |
| FRC0011        | <i>C. ulcerans tox-</i>            | + | - | + | - | ND | <i>C. ulcerans tox-</i>           |
| FRC0012        | <i>C. ulcerans tox-</i>            | + | - | + | - | ND | <i>C. ulcerans tox-</i>           |
| FRC0042a       | <i>C. ulcerans tox+</i>            | + | - | + | + | +  | <i>C. ulcerans tox+</i>           |
| FRC0058        | <i>C. ulcerans tox+</i>            | + | - | + | + | -  | <i>C. ulcerans tox+</i>           |
| FRC0187        | <i>C. ulcerans tox+</i>            | + | + | - | + | -  | <i>C. ulcerans tox+</i>           |
| FRC0567        | <i>C. ulcerans tox+</i>            | + | - | + | + | +  | <i>C. ulcerans tox+</i>           |
| FRC0569        | <i>C. ulcerans tox-</i>            | + | - | + | - | ND | <i>C. ulcerans tox-</i>           |
| 05-770         | <i>C. ulcerans tox-</i>            | + | - | + | - | ND | <i>C. ulcerans tox-</i>           |
| 05-146         | <i>C. ulcerans tox-</i>            | + | - | + | - | ND | <i>C. ulcerans tox-</i>           |
| UFBA C231      | <i>C. pseudotuberculosis tox-</i>  | + | - | + | - | ND | <i>C. pseudotuberculosis tox-</i> |
| UFBA C232 pld- | <i>C. pseudotuberculosis tox-</i>  | + | - | + | - | ND | <i>C. pseudotuberculosis tox-</i> |
| FRC0041        | <i>C. pseudotuberculosis tox-</i>  | + | - | + | - | ND | <i>C. pseudotuberculosis tox-</i> |
| FRC0186        | <i>C. pseudotuberculosis tox-</i>  | + | - | + | - | ND | <i>C. pseudotuberculosis tox-</i> |
| FRC0386        | <i>Corynebacterium amycolatum</i>  | + | - | - | - | ND | Non <i>diphtheriae</i> complex    |
| FRC0539        | <i>Corynebacterium aurimucosum</i> | + | - | - | - | ND | Non <i>diphtheriae</i> complex    |
| FRC0388        | <i>Enterobacter aerogenes</i>      | + | - | - | - | ND | Non <i>diphtheriae</i> complex    |
| FRC0392        | <i>Enterococcus faecalis</i>       | + | - | - | - | ND | Non <i>diphtheriae</i> complex    |
| FRC0413        | <i>Propionibacterium avidum</i>    | + | - | - | - | ND | Non <i>diphtheriae</i> complex    |
| FRC0427        | <i>Bacillus clausii</i>            | + | - | - | - | ND | Non <i>diphtheriae</i> complex    |
| FRC0428        | <i>Streptococcus pyogenes</i>      | + | - | - | - | ND | Non <i>diphtheriae</i> complex    |
| FRC0572        | <i>Neisseria subflava</i>          | + | - | - | - | ND | Non <i>diphtheriae</i> complex    |

Samples

|             |                                          |   |   |   |   |    |                                |
|-------------|------------------------------------------|---|---|---|---|----|--------------------------------|
| FRC0540     | Nasopharyngeal aspiration/<br>kit DNeasy | + | - | - | - | ND | Non <i>diphtheriae</i> complex |
| FRC0058-12N | Nose swab/ boiling                       | + | - | - | - | ND | Non <i>diphtheriae</i> complex |
| FRC0058-15N | Nose swab/ boiling                       | + | - | - | - | ND | Non <i>diphtheriae</i> complex |
| FRC0058-12T | Throat swab/ boiling                     | + | - | - | - | ND | Non <i>diphtheriae</i> complex |

|             |                            |   |   |   |   |    |                                |
|-------------|----------------------------|---|---|---|---|----|--------------------------------|
| FRC0058-15T | Throat swab/ boiling       | + | - | - | - | ND | Non <i>diphtheriae</i> complex |
| FRC0058-06  | Throat swab/ boiling       | + | - | - | - | ND | Non <i>diphtheriae</i> complex |
| FRC0058-07  | Throat swab/ boiling       | + | - | - | - | ND | Non <i>diphtheriae</i> complex |
| FRC0058-08  | Throat swab/ boiling       | + | - | - | - | ND | Non <i>diphtheriae</i> complex |
| FRC0058-09  | Throat swab/ boiling       | + | - | - | - | ND | Non <i>diphtheriae</i> complex |
| FRC0541     | Throat swab/ kit Dneasy    | + | - | - | - | ND | Non <i>diphtheriae</i> complex |
| FRC0060     | Pseudomembrane/ kit Dneasy | + | - | - | - | ND | Non <i>diphtheriae</i> complex |
| FRC0064     | Pseudomembrane/ kit Dneasy | + | - | - | - | ND | Non <i>diphtheriae</i> complex |
| FRC0018     | Pseudomembrane/ kit Dneasy | + | + | - | + | ND | <i>C. diphtheriae</i> tox+     |
|             | Pseudomembrane/ boiling    | + | + | - | + | ND | <i>C. diphtheriae</i> tox+     |
| FRC0042a    | Pseudomembrane/ kit Dneasy | + | - | + | + | ND | <i>C. ulcerans</i> tox+        |
|             | Pseudomembrane/ boiling    | + | - | + | + | ND | <i>C. ulcerans</i> tox+        |
| FRC0051     | Pseudomembrane/ kit Dneasy | + | - | - | - | ND | Non <i>diphtheriae</i> complex |
|             | Pseudomembrane/ boiling    | + | - | - | - | ND | Non <i>diphtheriae</i> complex |
| FRC0058     | Pseudomembrane/ kit Dneasy | + | - | + | + | ND | <i>C. ulcerans</i> tox+        |
|             | Pseudomembrane/ boiling    | + | - | + | + | ND | <i>C. ulcerans</i> tox+        |

\* Initial species identification was defined by end point PCR and/or MALDI-TOF and the *tox* status was defined by end point PCR.

FRC0058-12N; FRC0058-12T; FRC0058-15N; FRC0058-15T are swabs samples from nose (N) or throat (T) of contacts of patient FRC0058. For contacts from FRC0058-06 to FRC0058-09 only throat samples were taken.

ND: Not done



Table 2. Oligonucleotides sequences and expected amplicon sizes of the four gene targets

| Target gene                  | Oligonucleotide name | Sequence (5' 3')                                                        | — | Amplicon Fragment size (bp) | Reference                    |
|------------------------------|----------------------|-------------------------------------------------------------------------|---|-----------------------------|------------------------------|
| <i>C. diphtheriae rpoB</i> * | dip_rpobF            | CGT TCG CAA AGA TTA CGG AAC CA                                          |   |                             |                              |
|                              | dip_rpobR            | CAC TCA GGC GTA CCA ATC AAC                                             |   | 97 bp                       | De Zoysa <i>et al</i> (2016) |
|                              | Cdip HP              | HEX <sup>§</sup> -AGG TTC CGG GGC TTC TCG ATA TTC A-BHQ <sup>  </sup> 1 |   |                             |                              |
| <i>C. ulcerans rpoB</i>      | ulc_rpobF            | TTC GCA TGG CTC ATT GGC AC                                              |   |                             |                              |
|                              | ulc_rpobR            | TCC AGG ATG TCT TCC AGT CC                                              |   | 98 bp                       | De Zoysa <i>et al</i> (2016) |
|                              | CulcHP               | FAM-CCA GCA GGA GGA GCT GGG TGA A-BHQ1                                  |   |                             |                              |
| <i>tox</i> †                 | toxAF                | CTT TTC TTC GTA CCA CGG GAC TAA                                         |   |                             |                              |
|                              | toxAR                | CTA TAA AAC CCT TTC CAA TCA TCG TC                                      |   | 117 bp                      | De Zoysa <i>et al</i> (2016) |
|                              | diptoxHP             | ROX <sup>¶</sup> -AAG GTA TAC AAA AGC CAA AAT CTG GTA CACA AGG-BHQ2     |   |                             |                              |
| Universal 16S rRNA           | 16S_u_F              | TGT CGT CAG CTC GTG TCG TG                                              |   |                             |                              |
|                              | 16S_u_R              | ACG TCA TCC CCA CCT TCC TC                                              |   | 136 bp                      | This study                   |
|                              | 16S_u_HP             | LC640-TCC CGC AAC GAG CGC AAC CCT T-BHQ2                                |   |                             |                              |

\*rRNA

polymerase  $\beta$ -subunit-encoding gene.

†Diphtheria toxin gene.

§Hexachlorofluorescein.

||Black-hole quencher.

¶6-Carboxyl-X-rhodamine.

**Table 3. Comparison of crossing thresholds (Ct) values obtained using the Rotor-Gene Q (RGQ, Qiagen) and Lightcycler 480 II (LC480, Roche)\***

| Wave length<br>(target)   | 465-510<br>( <i>C. ulcerans</i> ) |         | 465-510<br>( <i>C. pseudotuberculosis</i> ) |         | 533-580<br>( <i>C. diphtheriae</i> ) |         | 533-610<br>( <i>tox</i> ) |         | 618-660<br>( <i>u16S</i> samples) |         | 618-660<br>( <i>u16S</i> NTC) |         |
|---------------------------|-----------------------------------|---------|---------------------------------------------|---------|--------------------------------------|---------|---------------------------|---------|-----------------------------------|---------|-------------------------------|---------|
|                           | RGQ                               | LC480   | RGQ                                         | LC480   | RGQ                                  | LC480   | RGQ                       | LC480   | RGQ                               | LC480   | RGQ                           | LC480   |
| <b>Thermocycler</b>       | RGQ                               | LC480   | RGQ                                         | LC480   | RGQ                                  | LC480   | RGQ                       | LC480   | RGQ                               | LC480   | RGQ                           | LC480   |
| <b>Average Ct</b>         | 21                                | 24      | 29                                          | 37      | 24                                   | 25      | 21                        | 24      | 19                                | 23      | 29                            | 33      |
| <b>Standard Deviation</b> | 0.73                              | 0.86    | 0.8                                         | 3.02    | 0.62                                 | 0.37    | 0.52                      | 0.36    | 0.63                              | 0.41    | 0.88                          | 0.51    |
| <b>Range (Min-Max)</b>    | 20 - 23                           | 24 - 28 | 29 - 32                                     | 32 - 40 | 22 - 25                              | 24 - 26 | 20 - 22                   | 23 - 25 | 17 - 20                           | 21 - 23 | 27 - 31                       | 31 - 34 |
| <b>Number of tests</b>    | 26                                | 35      | 12                                          | 9       | 38                                   | 56      | 28                        | 45      | 77                                | 113     | 23                            | 34      |

\* The DNA of each strain was tested at 10 pg/μL

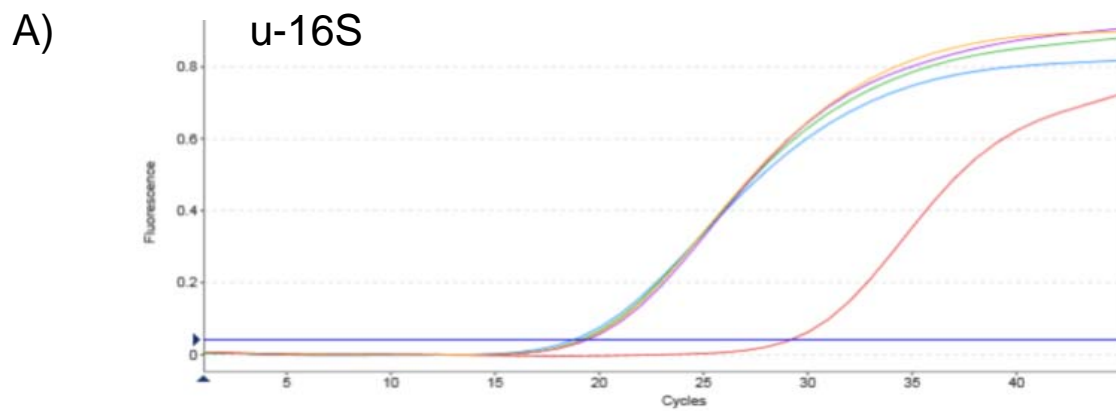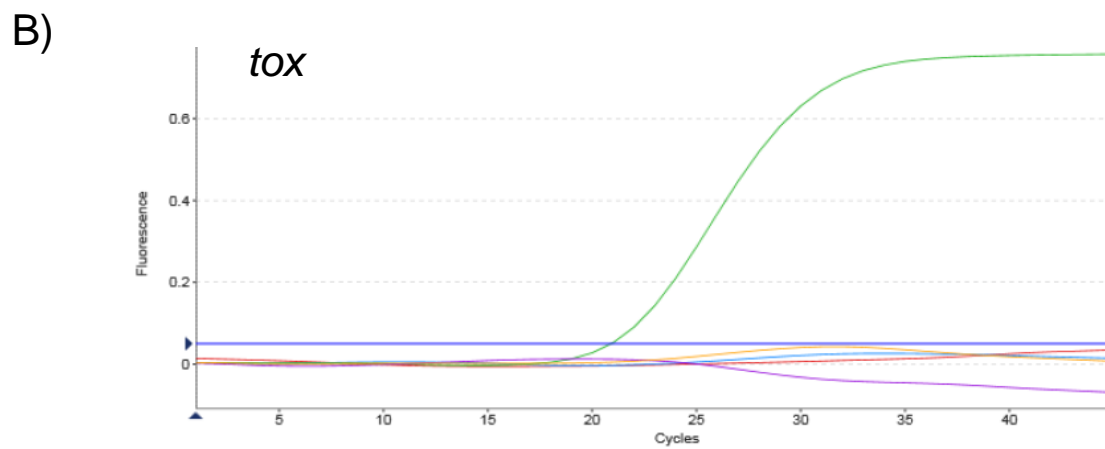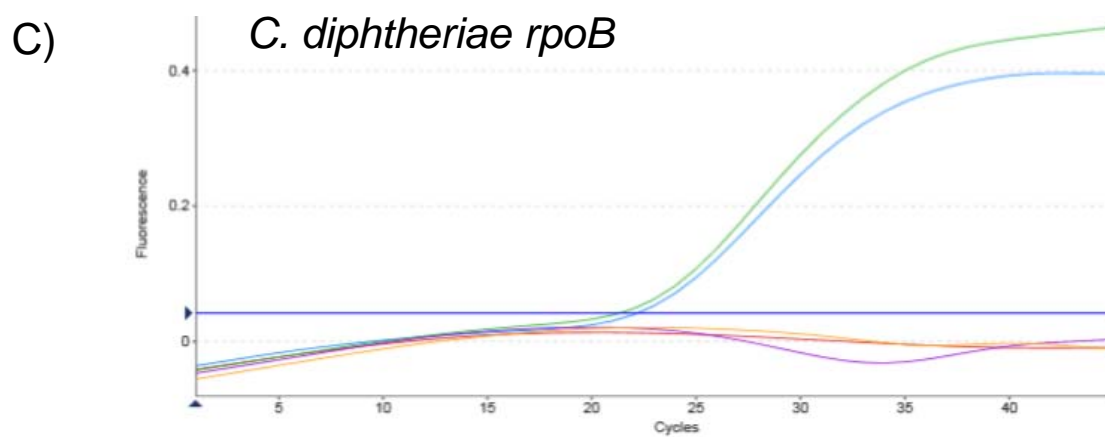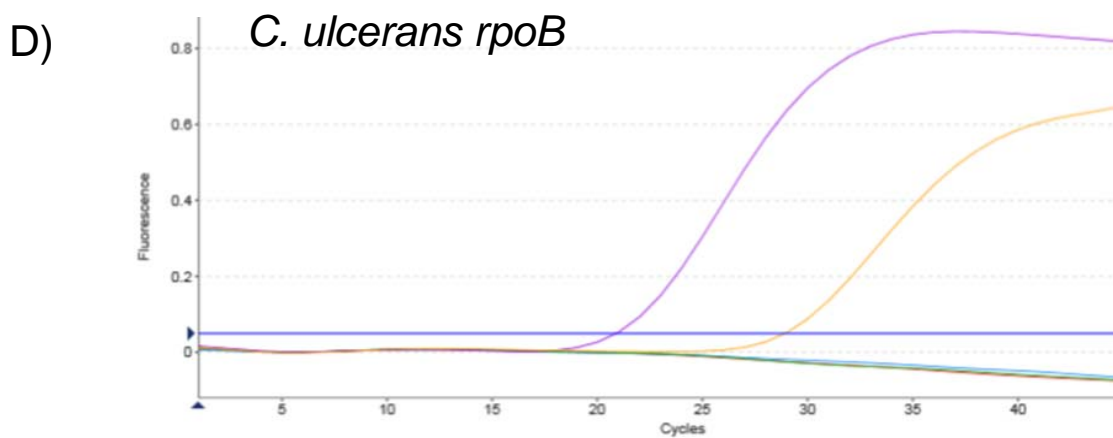

Source: https://www.biorxiv.org/content/10.1101/600270v1.full.pdf
